# Supplementary material
Source: PubMed Central journal article supplement (PMC3205337)
Supplement: NIHMS323462-supplement-03.pdf [file NIHMS323462-supplement-03.pdf]

**A) Control cells, EGFR/RaB11, co-staining, 40× objective**

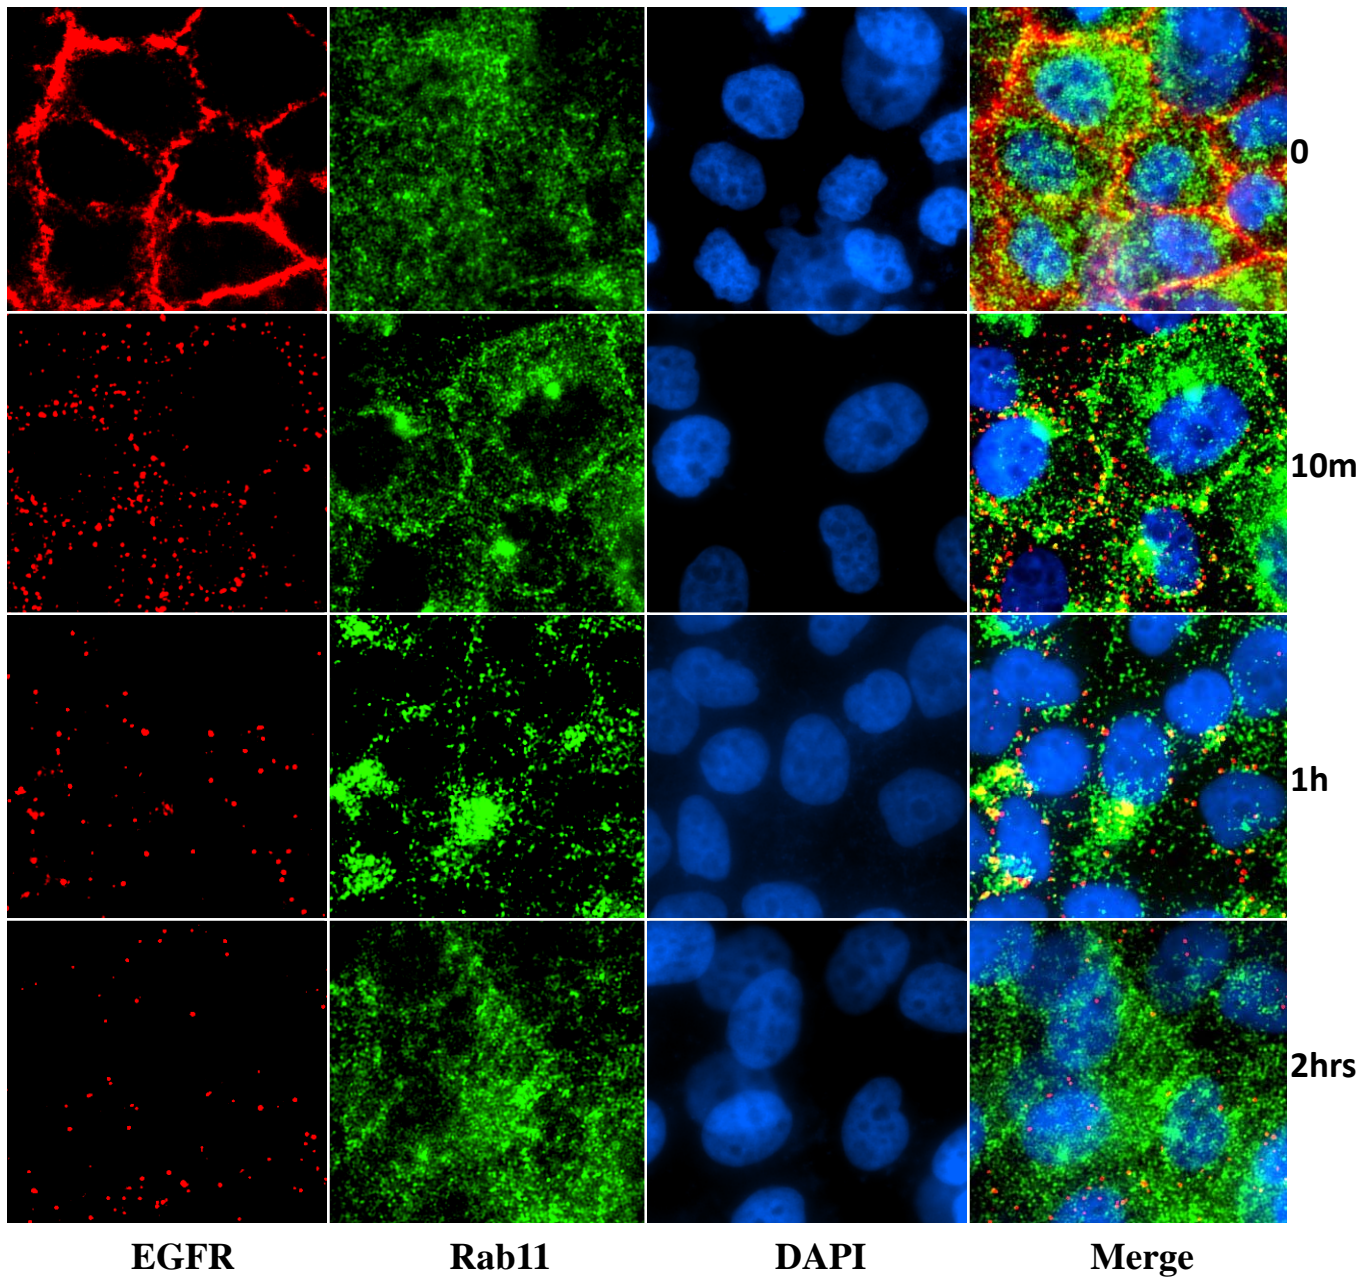

**Figure S3A**

**B) Control cells, EGFR/LAMP1, co-staining, 40× objective**

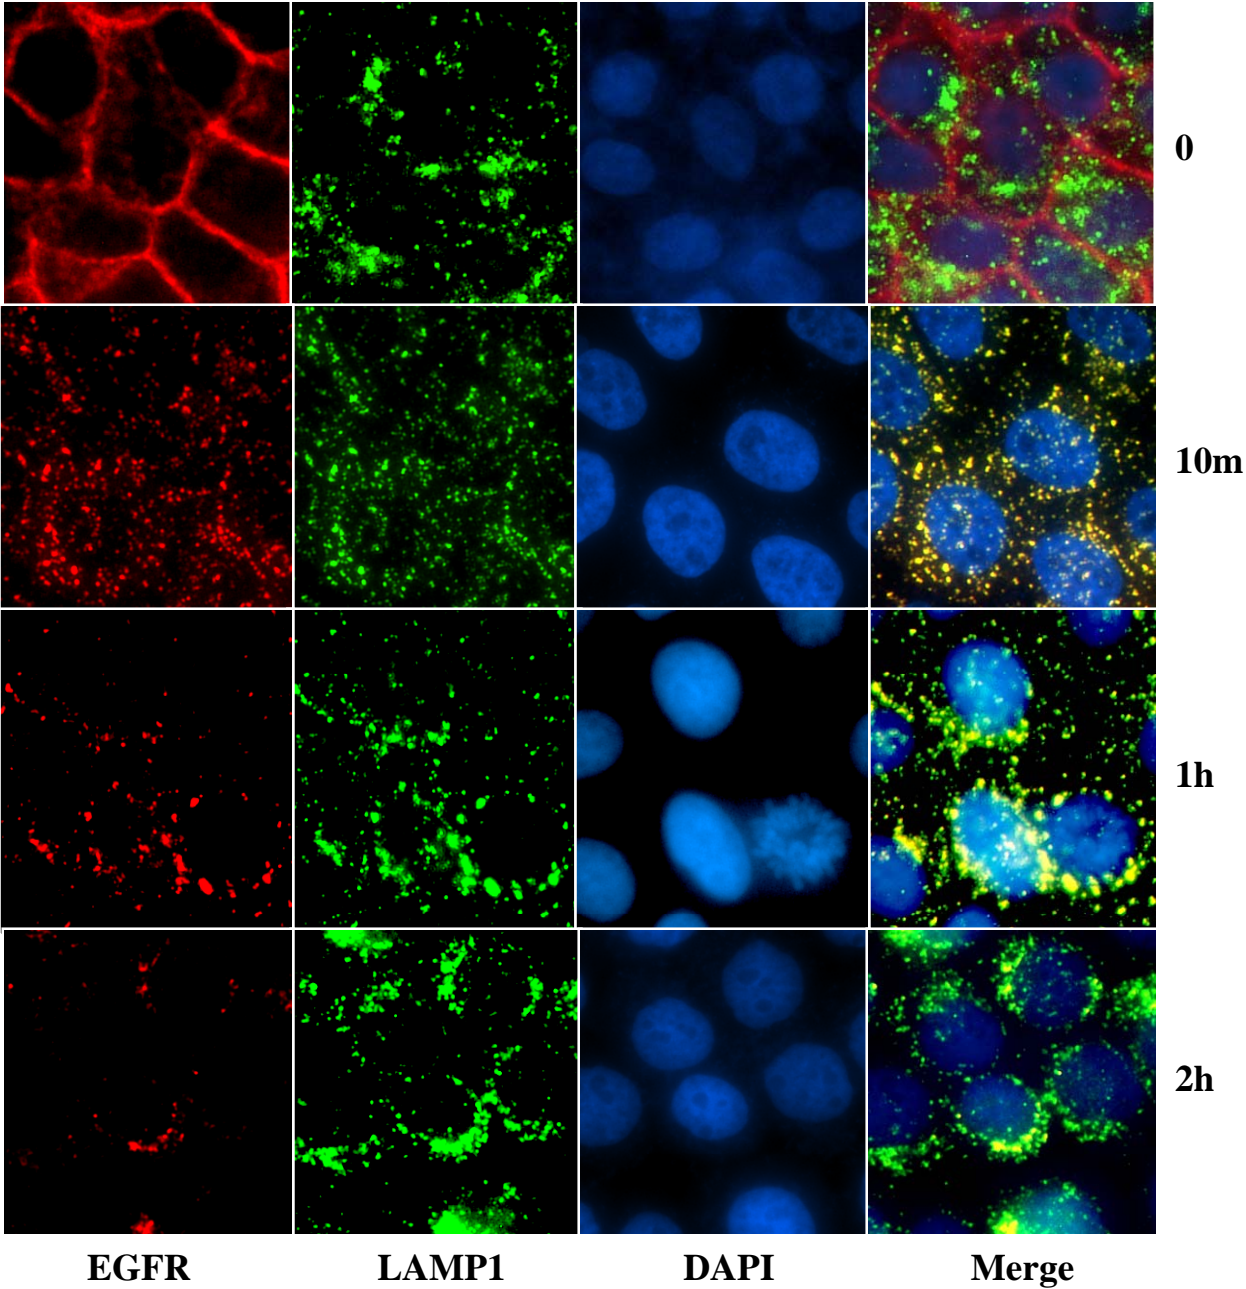

**Figure S3B**
