# Supplementary material
Source: PubMed Central journal article supplement (PMC3205337)

**S1A) Band density measurements, BT20**

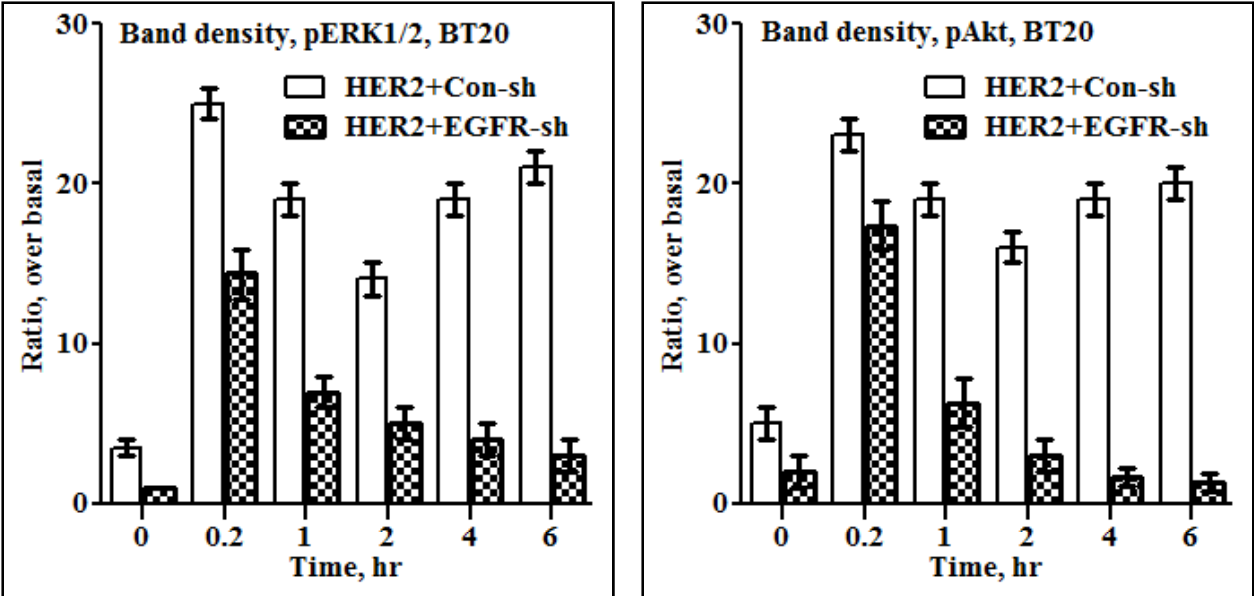

**Figure S1A**

**S1B) Band density measurements, BT474**

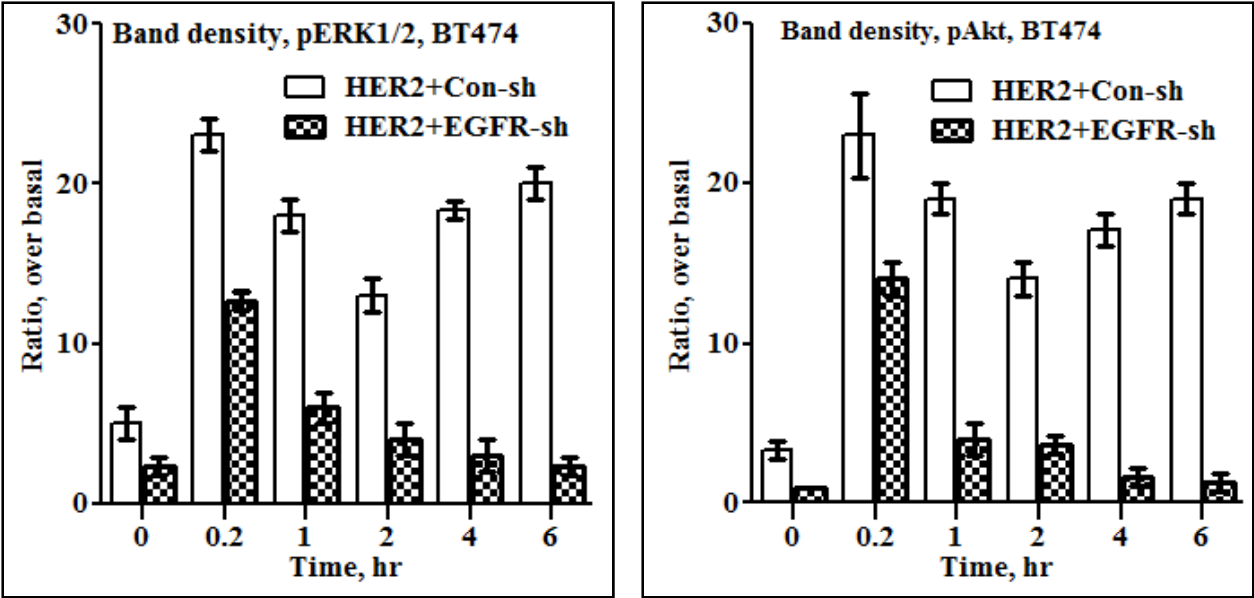

**Figure S1B**

Supplement: NIHMS323462-supplement-01.pdf [file NIHMS323462-supplement-01.pdf]

**Control cells, EGFR/HER2 co-staining, 40× objective**

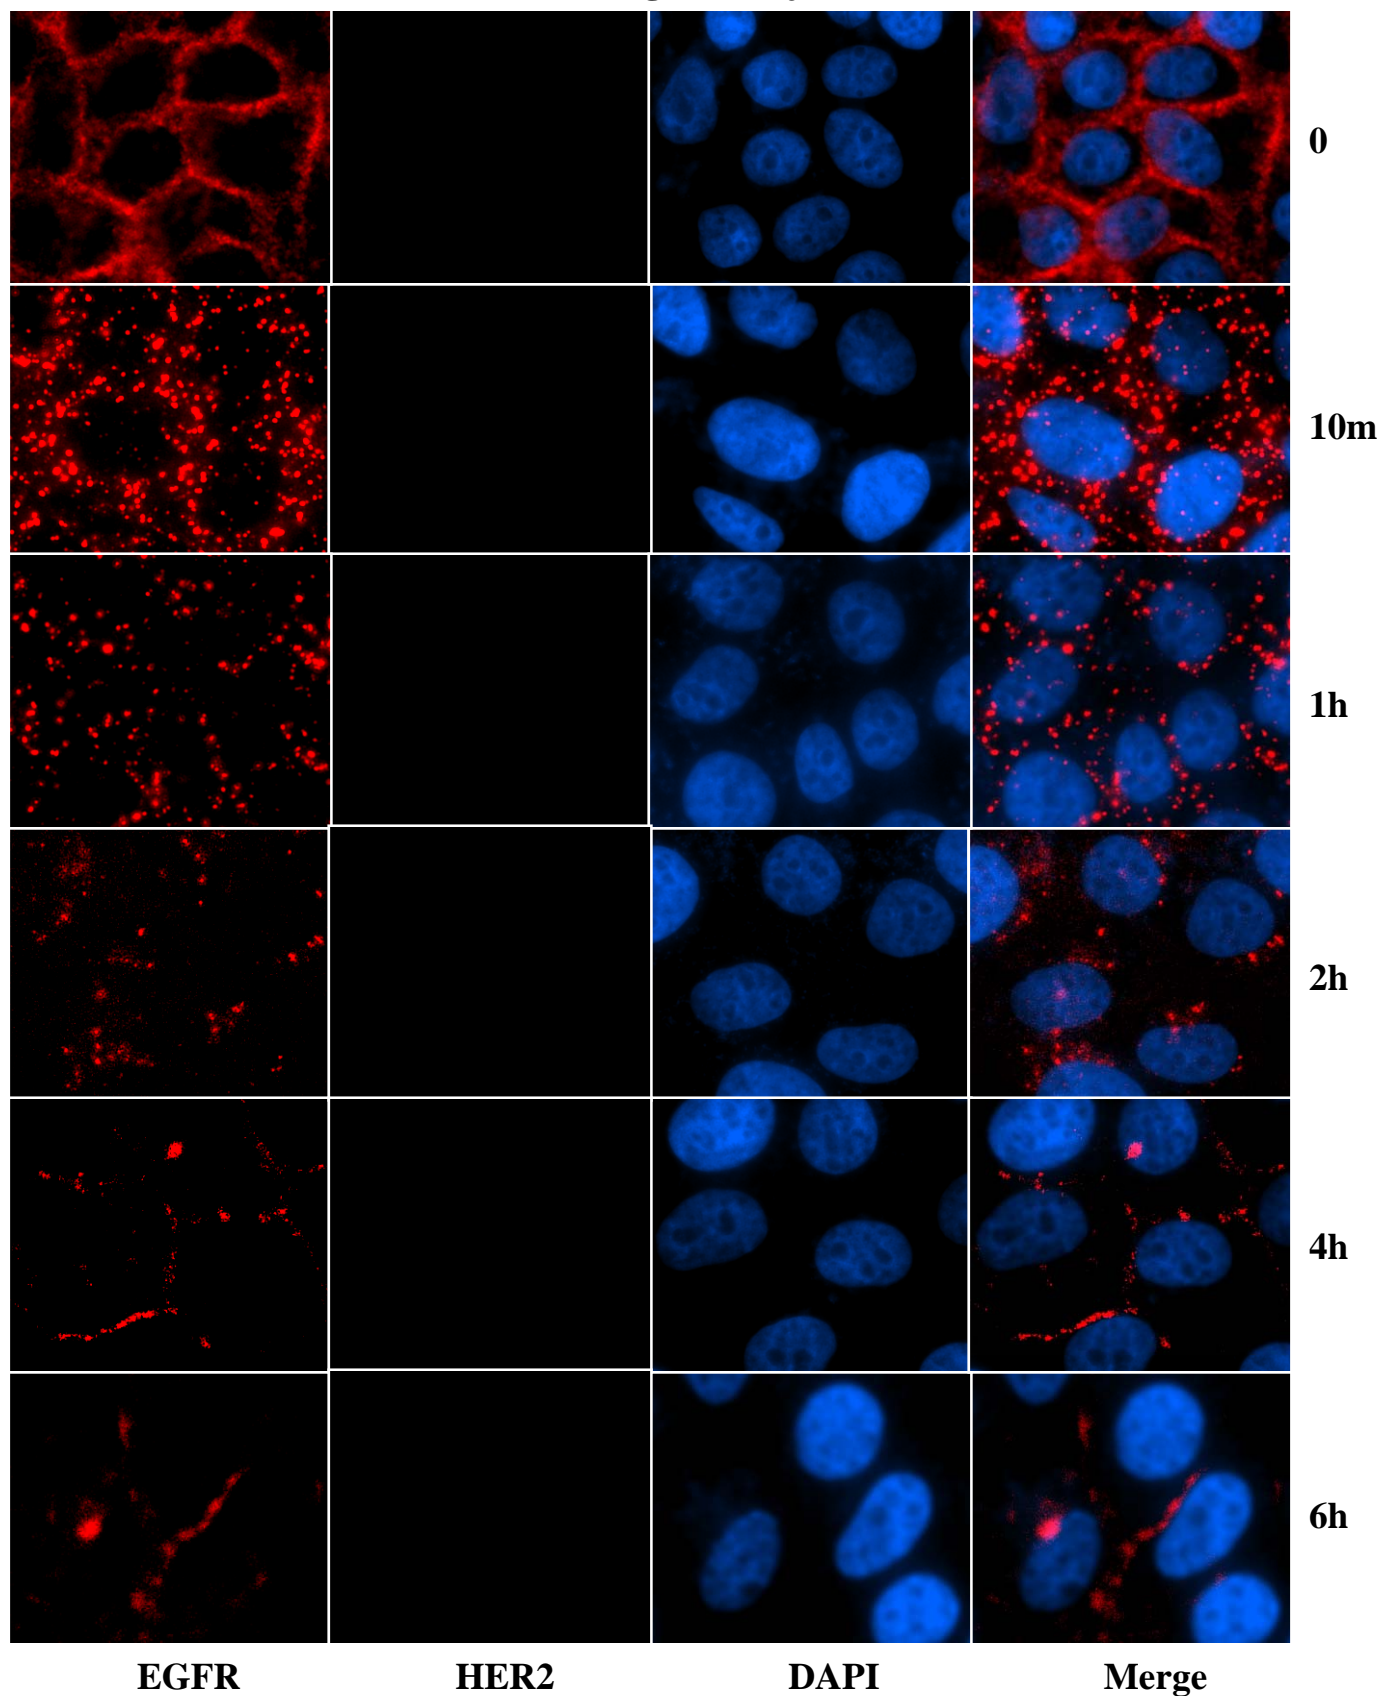

**Figure S2**

Supplement: NIHMS323462-supplement-02.pdf [file NIHMS323462-supplement-02.pdf]
